# Supplementary material
Source: PubMed Central journal article supplement (PMC5860254)
Supplement: kochanczyk_et_al_supplementary_information_btx456.pdf [file kochanczyk_et_al_supplementary_information_btx456.pdf]

This **Supplementary Material** features the article

**“SPATKIN: A simulator for rule-based modeling of biomolecular site dynamics on surfaces”**

by Kočańczyk *et al.*, *Bioinformatics*, 2017

This document is intended as a practical introduction to SPATKIN, that demonstrates its capabilities by providing 10 annotated tutorial “ $\mu$ models”:

|                                                                                                     |         |
|-----------------------------------------------------------------------------------------------------|---------|
| <b>Tutorial <math>\mu</math>model 1: Heterogeneous initial location of molecules</b> . . . . .      | page 2  |
| <b>Tutorial <math>\mu</math>model 2: Diffusion-limited aggregation</b> . . . . .                    | page 4  |
| <b>Tutorial <math>\mu</math>model 3: State-dependent removal from the membrane</b> . . . . .        | page 6  |
| <b>Tutorial <math>\mu</math>model 4: Rule-based capabilities (1)</b> . . . . .                      | page 8  |
| <b>Tutorial <math>\mu</math>model 5: Rule-based capabilities (2)</b> . . . . .                      | page 11 |
| <b>Tutorial <math>\mu</math>model 6: Gradient formation</b> . . . . .                               | page 14 |
| <b>Tutorial <math>\mu</math>model 7: Steady state controlled by diffusion</b> . . . . .             | page 16 |
| <b>Tutorial <math>\mu</math>model 8: Ligand-induced receptor dimerization</b> . . . . .             | page 18 |
| <b>Tutorial <math>\mu</math>model 9: Crowding-facilitated switch in a bistable system</b> . . . . . | page 21 |
| <b>Tutorial <math>\mu</math>model 10: Traveling wave</b> . . . . .                                  | page 24 |

All “ $\mu$ models” are shown in the form of complete, runnable inputs, and are included as separate files in the source code distribution of SPATKIN (in the directory `doc/examples`). An archive containing these files can be also [downloaded directly](#) from the software Web site. Additional SPATKIN documentation can be found in the [User Manual](#).

## Tutorial $\mu$ model 1: Heterogeneous initial location of molecules

This example (see [Listing 1](#)) shows how user-defined regions can be used to place molecules in a non-homogeneous manner on the lattice. One region is used to constrain the initial placement of molecules  $A(x\sim U, y\sim U)$  (drawn grey), at time=0; other regions are filled with molecules B (red) and C (blue) in the course of simulation according to a temporally constrained emergence rule. Molecules B modify molecules  $A(x\sim U, y\sim U)$  into  $A(x\sim P, y\sim U)$  – green. Molecules C modify molecules  $A(x\sim U, y\sim U)$  into  $A(x\sim U, y\sim P)$  – yellow. Molecules A and B degrade slowly. Simulation shows how polarization can be introduced to the system and how it vanishes due to diffusion.

```
begin parameters
  m 3
  m2 10   k 0.1   # This is a free-format text, meaning that line breaks
  r 10   q 0.01  # do not matter.
end

begin world
  topology plane size 200 200
end

begin regions
  # Two basic primitives for defining regions are circles and rectangles.
  CircRgn circle 100 100 50 # centerX centerY radius
  RectRgn rectangle 100 150 200 100 # centerX centerY width height

  # Typical constructive geometry operations are supported:
  RgnX !CircRgn # !a =: complement of set a
  RgnY (CircRgn * RectRgn) # (a * b) =: intersection of a and b
  RgnZ (CircRgn - RectRgn) # (a - b) =: subtraction of b from a
end

begin molecule types
  A(x,y) B() C()
end

begin seed species # Number of molecules or frac-
  A(x~U,y~U) occupancy 0.1 in region RgnX # tional (region) occupancy
end # should be given here.
```

```

begin event rules
  # Diffusion, molecule emergence and degradation rules have prefix syntax.
  >> A() m # |
  >> B() m2 # >- diffusion
  >> C() m2 # |

  # Following 2 rules for molecule insertion are both spatially and
  # temporally constrained; effective rate of insertion is proportional
  # to the number of unoccupied lattice nodes (here, in a region):
  ++ B() k in region RgnY since 5 until 8
  ++ C() k in region RgnZ since 5 until 8

  B() + A(x~U,y~U) -> B() + A(x~P,y~U) r
  C() + A(x~U,y~U) -> C() + A(x~U,y~P) r

  -- B() q -- C() q # Molecules B, C are degraded with rate q.
end

begin observables
  A A(x~U,y~U) color lightgrey # All observables that
  Ax A(x~P,y~U) color green # have assigned colors
  Ay A(x~U,y~P) color gold # are recorded in the
  B B() color red # trajectory file.
  C C() color blue #
end

begin simulation
  time end 300 # Total duration (in simulation time units).
  observer intervals 100 # No. time points at which logging occurs.
end

```

Listing 1: Tutorial input file 1 (doc/examples/tutorial/01-regions.spatkin).

## Tutorial $\mu$ model 2: Diffusion-limited aggregation

This example ([Listing 2](#)) demonstrates diffusion-limited aggregation in just 3 (effectively 2) rules (rules of zero rate are omitted).

```
begin parameters
  m      10
  kfast 10000
end

begin world
  topology plane size 120 120
end

begin regions
  Seeds cells 20,30; 70,20; 82,82 # Region consists of single lattice nodes.
end

begin molecule types
  Particle(mobile)
end

begin seed species
  Particle(mobile~U) occupancy 1.0 in region Seeds # confined to a region
  Particle(mobile~P) occupancy 0.2                # distributed uniformly
end

begin event rules
  "Gogogo!":
  >> Particle(mobile~P) m # A named rule for diffusion.

  >> Particle(mobile~U) 0 # Anonymous rule (referred to as rule "2").

  # According to the above rules, molecule diffusivity depends on its state.
  Particle(mobile~P) + Particle(mobile~U) ->
  Particle(mobile~U) + Particle(mobile~U) kfast
end
```

```
begin observables
  frost Particle(mobile~P) color lightgreen # An array of observables colors
  snow Particle(mobile~U) color orangered # has been predefined for user's
end # convenience (see user manual).

begin simulation
  time end 100 # If there are no more events, a warning will be issued.
  observer intervals 200
end
```

Listing 2: Tutorial input file 2 (doc/examples/tutorial/02-aggregation.spatkin).

## Tutorial $\mu$ model 3: State-dependent removal from the membrane

This example ([Listing 3](#)) is inspired by the fact that lipid modification, such as palmitoylation or farnesylation, can affect membrane attachment of proteins; for example, G protein  $\alpha$  subunit is depalmitoylated upon stimulation and then translocates to cytosol.

```
begin parameters
  m1 10
  b 1
  d 10
  u 10
  x 0.1
end

begin world
  topology plane size 100 100
end

begin regions (* none *) end

begin molecule types          # By defining relative molecular weights in
  Thioesterase(a) weight 1    # this manner, we assure that Thioesterase,
  AlphaS(palmito) weight 0    # which is assumed immobile, does not move
end                            # upon binding/unbinding AlphaS.

begin seed species
  AlphaS(palmito~P) 1000      # site 'palmito' defined explicitly as unbound
  Thioesterase(a) 10          # site 'a'          defined explicitly as unbound
end

begin event rules
  >> Thioesterase(a) 0        # assumed immobile
  >> AlphaS(palmito) m1       # assumed mobile
  Thioesterase(a) + AlphaS(palmito~P) ->Thioesterase(a!1).AlphaS(palmito~P!1) b
  Thioesterase(a!1).AlphaS(palmito~P!1)->Thioesterase(a!1).AlphaS(palmito~U!1) d
  Thioesterase(a!1).AlphaS(palmito~U!1)->Thioesterase(a) + AlphaS(palmito~U) u
  -- AlphaS(palmito~U) x      # removal of depalmitoylated AlphaS from membrane
end
```

```

begin observables
  A_palmi   AlphaS(palmito~P!?) color lightpink # '?!' means that the status of
  A_depalmi AlphaS(palmito~U!?) color red        # binding is irrelevant here
  T         Thioesterase()      color darkblue
end

begin simulation
  description "Depalmitoylation v0.1" # Descriptions are copied into results.
  duration 300                        # Bimolecular complexes are occasionally
  observer intervals 100              # seen in trajectory as split hexagons.
end

```

Listing 3: Tutorial input file 3 (doc/examples/tutorial/03-depalmitoylation.spatkin).

## Tutorial $\mu$ model 4: Rule-based capabilities (1)

This example (Listing 4) demonstrates rule-based capabilities.

Each molecule S (“substrate”) can be independently phosphorylated on 10 residues, meaning that S may assume one of  $2^{10} = 1024$  phosphorylation states. Residues A, B, C, D, E can be phosphorylated by kinase K1 which is recruited and remains tethered in the circular region RgnL; residues F, G, H, I, J can be phosphorylated by kinase K2 that is recruited and remains tethered in the circular region RgnR (in this way, occurrence of several second-order reactions is constrained spatially). To become phosphorylated on all residues (dark red observable), S must visit both regions.

In the absence of phosphatase activity (parameter  $k_u = 0$ ), all S are ultimately phosphorylated but even a weak activity of uniformly distributed phosphatases (parameter  $k_u = 0.01$ ) prevents simultaneous phosphorylation of S on all residues.

```
begin parameters
  m      10.      # diffusivity
  kadd   0.1      # insertion rate
  kp     10.      # kinase activity
  ku     0.0      # phosphatase activity <-- CHOOSE: ku=0 or ku=0.01
  occuS  0.1     # substrate occupancy
  occuP  0.03    # phosphatase occupancy
end

begin world
  topology plane size 200 100
end

begin regions
  RgnL  circle  50 50 30
  RgnR  circle 150 50 30
end

begin molecule types
  S(A,B,C,D,E,F,G,H,I,J) # a multi-site substrate
  K1()                    # a kinase
  K2()                    # another kinase
  P()                     # a phosphatase
end
```



```
begin seed species
```

```
S(A~U,B~U,C~U,D~U,E~U,F~U,G~U,H~U,I~U,J~U) occupancy occuS
```

```
P() occupancy occuP
```

```
end
```

```
begin event rules
```

```
>> S() m # By omitting diffusive rules for K1 and K2, they are
```

```
>> P() m # made immobile.
```

```
K1() + S(A~U) -> K1() + S(A~P) kp
```

```
P() + S(A~P) -> P() + S(A~U) ku
```

```
K1() + S(B~U) -> K1() + S(B~P) kp
```

```
P() + S(B~P) -> P() + S(B~U) ku
```

```
K1() + S(C~U) -> K1() + S(C~P) kp
```

```
P() + S(C~P) -> P() + S(C~U) ku
```

```
K1() + S(D~U) -> K1() + S(D~P) kp
```

```
P() + S(D~P) -> P() + S(D~U) ku
```

```
K1() + S(E~U) -> K1() + S(E~P) kp
```

```
P() + S(E~P) -> P() + S(E~U) ku
```

```
K2() + S(F~U) -> K2() + S(F~P) kp
```

```
P() + S(F~P) -> P() + S(F~U) ku
```

```
K2() + S(G~U) -> K2() + S(G~P) kp
```

```
P() + S(G~P) -> P() + S(G~U) ku
```

```
K2() + S(H~U) -> K2() + S(H~P) kp
```

```
P() + S(H~P) -> P() + S(H~U) ku
```

```
K2() + S(I~U) -> K2() + S(I~P) kp
```

```
P() + S(I~P) -> P() + S(I~U) ku
```

```

K2() + S(J~U) -> K2() + S(J~P) kp
P() + S(J~P) -> P() + S(J~U) ku

++ K1() kadd in region RgnL since 1.0 until 3.0
++ K2() kadd in region RgnR since 5.0 until 7.0
end

begin observables
S_10u S(A~U,B~U,C~U,D~U,E~U,F~U,G~U,H~U,I~U,J~U) color blue
S_5pNterm S(A~P,B~P,C~P,D~P,E~P,F~U,G~U,H~U,I~U,J~U) color gold
S_5pCterm S(A~U,B~U,C~U,D~U,E~U,F~P,G~P,H~P,I~P,J~P) color pink
S_10p S(A~P,B~P,C~P,D~P,E~P,F~P,G~P,H~P,I~P,J~P) color darkred
K1 K1() color black
K2 K2() color dimgrey
P P() color green
end

begin simulation
time end 500
observer intervals 100
end

```

Listing 4: Tutorial input file 4 (doc/examples/tutorial/04-rule\_based\_1.spatkin).

## Tutorial $\mu$ model 5: Rule-based capabilities (2)

This example (Listing 5) is a further demonstration of rule-based capabilities and extends the [previous example](#). Additionally here, independently of their phosphostate, molecules S can form homodimers, so there are  $(2^{10})^2/2 \simeq$  over half a million potential homodimer species (more than molecules in the simulation). Dimers in which one protomer is phosphorylated on A, B, C, D, E and the other is phosphorylated on F, G, H, I, J are stabilized (not allowed to dissociate).

```
begin parameters
  m      10.    # diffusivity
  kadd   0.1    # insertion rate
  kp     10.    # kinase activity
  ku     0.0    # phosphatase activity <-- CHOOSE: ku=0 or ku=0.01
  occuS  0.1    # S occupancy
  occuP  0.03   # phosphatase ocupancy
  b      1     # S homodimerization
  d      1     # S-S un-dimerization
  stb   100    # S-S homodimer stabilization
end

begin world
  topology plane size 200 100
end

begin regions
  RgnL circle 50 50 30
  RgnR circle 150 50 30
end

begin molecule types
  S(A,B,C,D,E,F,G,H,I,J,dim,stable)
  K1() K2() P()
end

begin seed species
  S(A~U,B~U,C~U,D~U,E~U,F~U,G~U,H~U,I~U,J~U,dim,stable~U) occupancy occuS
  P() occupancy occuP
end
```

begin event rules

>> S() m

>> S(dim!1).S(dim!1) m # diffusion of S-S dimer

>> P() m

K1() + S(A~U) -> K1() + S(A~P) kp

P() + S(A~P) -> P() + S(A~U) ku

K1() + S(B~U) -> K1() + S(B~P) kp

P() + S(B~P) -> P() + S(B~U) ku

K1() + S(C~U) -> K1() + S(C~P) kp

P() + S(C~P) -> P() + S(C~U) ku

K1() + S(D~U) -> K1() + S(D~P) kp

P() + S(D~P) -> P() + S(D~U) ku

K1() + S(E~U) -> K1() + S(E~P) kp

P() + S(E~P) -> P() + S(E~U) ku

K2() + S(F~U) -> K2() + S(F~P) kp

P() + S(F~P) -> P() + S(F~U) ku

K2() + S(G~U) -> K2() + S(G~P) kp

P() + S(G~P) -> P() + S(G~U) ku

K2() + S(H~U) -> K2() + S(H~P) kp

P() + S(H~P) -> P() + S(H~U) ku

K2() + S(I~U) -> K2() + S(I~P) kp

P() + S(I~P) -> P() + S(I~U) ku

K2() + S(J~U) -> K2() + S(J~P) kp

P() + S(J~P) -> P() + S(J~U) ku

S(dim) + S(dim) -> S(dim!1).S(dim!1) b

```

S(A~P,B~P,C~P,D~P,E~P,dim!1,stable~U).S(F~P,G~P,H~P,I~P,J~P,dim!1,stable~U)
->
S(A~P,B~P,C~P,D~P,E~P,dim!1,stable~U).S(F~P,G~P,H~P,I~P,J~P,dim!1,stable~P)
stb

    S(dim!1,stable~U).S(dim!1,stable~U) -> S(dim,stable~U) + S(dim,stable~U) d

++ K1() kadd  in region RgnL  since 1.0  until 3.0
++ K2() kadd  in region RgnR  since 5.0  until 7.0
end

begin observables
S_10u      S(A~U,B~U,C~U,D~U,E~U,F~U,G~U,H~U,I~U,J~U) color blue
S_5pNterm S(A~P,B~P,C~P,D~P,E~P,F~U,G~U,H~U,I~U,J~U) color gold
S_5pCterm S(A~U,B~U,C~U,D~U,E~U,F~P,G~P,H~P,I~P,J~P) color pink
S_10p     S(A~P,B~P,C~P,D~P,E~P,F~P,G~P,H~P,I~P,J~P) color darkred
SS_dim_stable S(dim!+,stable~P) color red # observing S-S dimer
K1 K1() color black
K2 K2() color dimgrey
P  P() color green
end

begin simulation
time end 500
observer intervals 100
end

```

Listing 5: Tutorial input file 5 (doc/examples/tutorial/05-rule\_based\_2.spatkin).

## Tutorial $\mu$ model 6: Gradient formation

This example (Listing 6) shows how a gradient of phosphorylated substrate can be formed between enzymes tethered to different “compartments” of the reactor.

```
begin parameters
  W 200      # Arithmetic expressions and previously defined parameters
  H W/3      # can be used to define parameters (evaluations are always
  A 8        # performed in double floating-point precision).
  m 3
  p 100
  q p
end

begin world
  topology planar size W H
end

begin regions
  reservoirK  rectangle W*( 1)/(2*A) H/2 W/A H # in-place arithmetics
  reservoirP  rectangle W*(2*A-1)/(2*A) H/2 W/A H #
end

begin molecule types  K() S(s) P() (* kinase, substrate, phosphatase *) end

begin seed species
  S(s~P)  occupancy 1/8      # not inserting: S(s~U), S(s~PP)
  K()     occupancy 1/32 in region reservoirK
  P()     occupancy 1/32 in region reservoirP
end

begin event rules
  >> S() m                                # K(), P() are immobile
  K() + S(s~U) -> K() + S(s~P)  2*p
  K() + S(s~P) -> K() + S(s~PP)  p
  P() + S(s~PP)-> P() + S(s~P)  2*q
  P() + S(s~P) -> P() + S(s~U)  q
end
```

```
begin observables
  K    K()    color darkmagenta
  S_u  S(s~U) color yellow    group S # Grouping observables may aid
  S_p  S(s~P) color orange   group S # trajectory visualization;
  S_pp S(s~PP) color red     group S # group "all" is always created.
  P    P()    color green
end

begin simulation
  duration 10000
  observer intervals 100
end
```

Listing 6: Tutorial input file 6 (doc/examples/tutorial/06-gradient\_formation.spatkin).

## Tutorial $\mu$ model 7: Steady state controlled by diffusion

In this example (Listing 7), lattice is divided into two regions; molecules located in one of them have significantly reduced diffusivity. By visual inspection of the trajectory it can be observed that diffusion controls the steady state (i.e., the fraction of phosphorylated S molecules – black). This case has been analyzed by Szymańska *et al.* [see Figure 2(b) in *Phys. Rev. E*, 2015, **91**, 022702].

```
begin parameters
  a      120      # -- geometric parameter
  rhoK   0.1      # \
  rhoP   rhoK/10 # -> parameters used to set up initial conditions
  rhoS   0.25     # /
end

begin world
  topology plane size 2*a a # width==2*height
end

begin regions
  Left rectangle a/2 a/2 a a diffusivity 0.01
end

begin molecule types
  K() P() S(s) # kinase, phosphatase, and their substrate
end

begin seed species
  K()      occupancy rhoK
  P()      occupancy rhoP
  S(s~U)   occupancy rhoS
end

begin event rules
  >> K() m >> P() m >> S() 100
  K() + S(s~U) -> K() + S(s~P) 1
  P() + S(s~P) -> P() + S(s~U) 100
end
```



```
begin observables
  K K()      color yellow
  P P()      color red
  Su S(s~U)  color lightgrey
  Sp S(s~P)  color black
end

begin settings
  time end 20
  observer intervals 200
end
```

Listing 7: Tutorial input file 7 (doc/examples/tutorial/07-diffusion\_controlled\_steady\_state.spatkin).

## Tutorial $\mu$ model 8: Ligand-induced receptor dimerization

This is an example (Listing 8) of excitable system where introduction of trivalent ligands that colocalize bivalent receptors facilitates their activatory autotransphosphorylation. This activity is further enhanced by recruitment and activation of autotransphosphorylating kinases and opposed by phosphatases which bind to and act on both activated receptors and kinases. This example is inspired by early events in B cell receptor signaling.

```
(*  
* This is a stochastic simulation of an excitable system, which means  
* that the system occasionally can get activated spontaneously (due to  
* a fluctuation). In such case, one can change random generator seed(s)  
* and re-run the simulation.  
*)  
  
begin parameters  
  m      10.  
  occuR  0.03 # receptor occupancy  
  occuK  0.1  # kinase occupancy  
  occuP  0.05 # phosphatase occupancy  
end  
  
begin world  
  topology plane size 64 64  
  random seed 12345 # This seed influences initial locations of molecules.  
end  
  
begin regions  
  patch circle 32 32 10  
end  
  
begin molecule types  
  K(P,K,R,A) # kinase  
  P(R,K)     # phosphatase  
  Ag[3]     # extracellular antigen, trivalent  
  R(P,K,A)[2] # bivalent receptor with 2 additional sites for binding K, P  
end
```

```

begin seed species
  R(P,K,A~U) [0,0] occupancy occuR # Molecules are inserted unbound.
  P(R,K)          occupancy occuP
  K(P,K,R,A~U)   occupancy occuK
end

begin event rules

  >> R() m      >> P() m      >> K() m

  # Immobile binders appear unbound in a lattice dual to the regular lattice.
  "Antigen appearance":
  ++ Ag[0,0,0] 0.01 in region patch since 200 until 220

  "Receptor-ligand binding", "Receptor-ligand unbinding":
  +-! R() & Ag[] 10, 0.01

  # Receptors activation in trans:
  R() + R(A~U) -> R() + R(A~P) 0.01
  R() + R(A~P) -> R() + R(A~PP) 0.01
  R(A~P) + R(A~U) -> R(A~P) + R(A~P) 0.02
  R(A~P) + R(A~P) -> R(A~P) + R(A~PP) 0.02
  R(A~PP)+ R(A~U) -> R(A~PP) + R(A~P) 0.05
  R(A~PP)+ R(A~P) -> R(A~PP) + R(A~PP) 0.05

  R(P,K,A~PP) + K(P,K,R,A~U) -> R(P,K!1,A~PP) .K(P,K,R!1,A~U) 1
  R(K!1,A~PP) .K(P,K,R!1,A~U) -> R(K!1,A~PP) .K(P,K,R!1,A~P) 10
  R(K!1) .K(R!1) -> R(K) + K(R) 1

  K(P,K,R,A~P) + K(P,K,R,A~U) -> K(P,K!1,R,A~P) .K(P,K!1,R,A~U) 1
  K(P,K!1,R,A~P) .K(P,K!1,R,A~U) -> K(P,K!1,R,A~P) .K(P,K!1,R,A~P) 10
  K(K!1) .K(K!1) -> K(K) + K(K) 1

  P(R,K) + R(P,K,A~PP) -> P(R!1,K) .R(P!1,K,A~PP) 3
  P(R,K) + R(P,K,A~P) -> P(R!1,K) .R(P!1,K,A~P) 3
  P(R!1,K) .R(P!1,K,A~PP) -> P(R!1,K) .R(P!1,K,A~P) 10
  P(R!1,K) .R(P!1,K,A~P) -> P(R!1,K) .R(P!1,K,A~U) 10
  P(R!1) .R(P!1) -> P(R) + R(P) 1

```

```

P(R,K) + K(P,K,R,A~P)  -> P(R,K!1).K(P!1,K,R,A~P)          1
P(R,K!1).K(P!1,K,R,A~P) -> P(R,K!1).K(P!1,K,R,A~U)          10
P(K!1).K(P!1) -> P(K) + K(P)                                  1

end

begin observables
  Ag_tot      Ag[?!?,?!?,?!?]  color black
  Receptor_U  R(A~U)           color lightgrey
  Receptor_P  R(A~P)           color grey
  Receptor_PP R(A~PP)          color brown
  Kinase_inactive K(A~U)       color gold
  Kinase_active K(A~P)         color red
  Phosphatase  P()             color green
end

begin simulation
  time end 500
  observer intervals 1000
  snapshots on      # If you do not want snapshots, write: snapshots off
  random seed 12345 # This seed influences the order of events.
end

```

Listing 8: Tutorial input file 8 (doc/examples/tutorial/08-receptors\_and\_ligands.spatkin).

## Tutorial $\mu$ model 9: Crowding-facilitated switch in a bistable system

In this example (Listing 9), kinetics of a bistable system is simulated. In a defined instant, chemically inert molecules (“crowders”) are introduced which leads to reduction of reactants’ diffusivity. In this system, the presence of crowders favors processive rather than distributive phosphorylation, and in this way favors the steady state of a high amount of doubly phosphorylated kinases. Initially the system is in the steady state of a low amount of phosphorylated kinases; upon recruitment of crowders to the membrane, a transition to the other steady state is observed.

The effect of the presence of crowding molecules and their diffusivity on the effective diffusivity of (other) molecules on the lattice has been analyzed by Szymańska *et al.* [see Figure 9 in *Phys. Rev. E*, 2015, **91**, 022702].

```
(*
 * This is a stochastic simulation of a bistable system, which means that
 * the system may occasionally switch to another state (though it is very
 * implausible). In such case, one can change random generator seed(s) and
 * re-run the simulation.
*)

begin parameters
  rhoK  0.4
  rhoP  0.1
  d      1    / (6 * rhoP)
  c1     0.02 / (6 * rhoK)
  c2     0.15 / (6 * rhoK)
  c3     4    / (6 * rhoK)
  m      300
end

begin world
  topology planar
  size 50 50
  random seed 123
end

begin regions
end
```

```

begin molecule types
  K(a) # self-activating kinase
  P() # phosphatase acting on the kinase
  C() # crowder
end

begin seed species
  P() occupancy rhoP
  K(a~U) occupancy rhoK
end

begin event rules

  ## Rules for reactants:
  #
  >> K() m >> P() m

  K(a~U) + K(a~U) -> K(a~U) + K(a~P) 2*c1
  K(a~U) + K(a~P) -> K(a~U) + K(a~PP) c1

  K(a~P) + K(a~U) -> K(a~P) + K(a~P) 2*c2
  K(a~P) + K(a~P) -> K(a~P) + K(a~PP) c2

  K(a~PP) + K(a~U) -> K(a~PP) + K(a~P) 2*c3
  K(a~PP) + K(a~P) -> K(a~PP) + K(a~PP) c3

  P() + K(a~P) -> P() + K(a~U) d
  P() + K(a~PP) -> P() + K(a~P) 2*d

  ## Rules for crowders:
  #
  ++ C() 0.15 since 36 until 40
  >> C() m/10
end

begin observables
  K K(a~U) color yellow
  K_p K(a~P) color orange

```

```
K_pp K(a~PP) color red
P    P()    color lime
C    C()    color dimgray # crowder
end

begin simulation
  duration 100
  observer intervals 1000
  random seed 123
  snapshots on
end
```

Listing 9: Tutorial input file 9 (doc/examples/tutorial/09-crowding\_facilitated\_switch.spatkin).

## Tutorial $\mu$ model 10: Traveling wave

The considered system contains phosphatases and auto-phosphorylating kinases reacting in a long cylindrical domain. This prototypical bistable system is the subject of the analysis described by Zuk *et al.* [*Phys. Biol.*, 2012, **5**, 055002] and Kočańczyk *et al.* [*J. R. Soc. Interface*, 2013, **10**, 20130151], where the concordance of particle-based simulations in SPATKIN and finite-element method-based simulations of a corresponding partial differential equation system is demonstrated.

```
(*
 * Please note that the simulation can take about two hours. Occasionally,
 * the stochastic traveling wave may fail to propagate or spontaneous self-
 * activation may occur in another part of the lattice -- in such case one
 * can change random number generator seed(s) and re-run the simulation.
 *)
begin parameters
  n_stat_K    183  # /
  n_stat_Kp   571  # > high-phospholevel steady state (calculated from ODEs)
  n_stat_Kpp  439  # /
  rhoK    0.4
  rhoP    0.1
  d        1    / (6 * rhoP)
  c1       0.02 / (6 * rhoK)
  c2       0.18 / (6 * rhoK)
  c3        4    / (6 * rhoK)
  m       1000
end

begin world
  topology planar  size 404 30  random seed 123456789
end

begin regions
  Barrier  rectangle  402 15    4 30  diffusivity 0  # reflective boundary
  Ignition rectangle   50 15   100 30
  Rest     rectangle  250 15   300 30
end

begin molecule types  K(a)  P()  end
```



```

begin seed species
  P()      occupancy rhoP   in region Ignition
  K(a~U)   n_stat_K       in region Ignition
  K(a~P)   n_stat_Kp      in region Ignition
  K(a~PP)  n_stat_Kpp     in region Ignition
  P()      occupancy rhoP   in region Rest
  K(a~U)   occupancy rhoK   in region Rest
end

begin event rules
  K(a~U) + K(a~U) -> K(a~U) + K(a~P) 2*c1
  K(a~U) + K(a~P) -> K(a~U) + K(a~PP) c1
  K(a~P) + K(a~U) -> K(a~P) + K(a~P) 2*c2
  K(a~P) + K(a~P) -> K(a~P) + K(a~PP) c2
  K(a~PP) + K(a~U) -> K(a~PP) + K(a~P) 2*c3
  K(a~PP) + K(a~P) -> K(a~PP) + K(a~PP) c3
  P() + K(a~P) -> P() + K(a~U) d
  P() + K(a~PP) -> P() + K(a~P) 2*d
  >> K() m
  >> P() m
end

begin observables
  K   K(a~U)   color yellow
  K_p K(a~P)   color orange
  K_pp K(a~PP) color red
  P   P()      color lime
end

begin simulation
  description "Induced chemical travelling wave"
  duration 100 observer intervals 200
  random seed 987654321
end

```

Listing 10: Tutorial input file 10 (doc/examples/tutorial/10-traveling\_wave.spatkin).
